# Supplementary material for: GRUN: An observations-based global gridded runoff dataset from 1902 to 2014
Source: Copernicus journal article supplement (doi:10.5194/essd-2019-32), 2019-03-12
Supplement: Supplementary file 1 [file essd-2019-32-supplement.pdf]

**Supplementary Material**

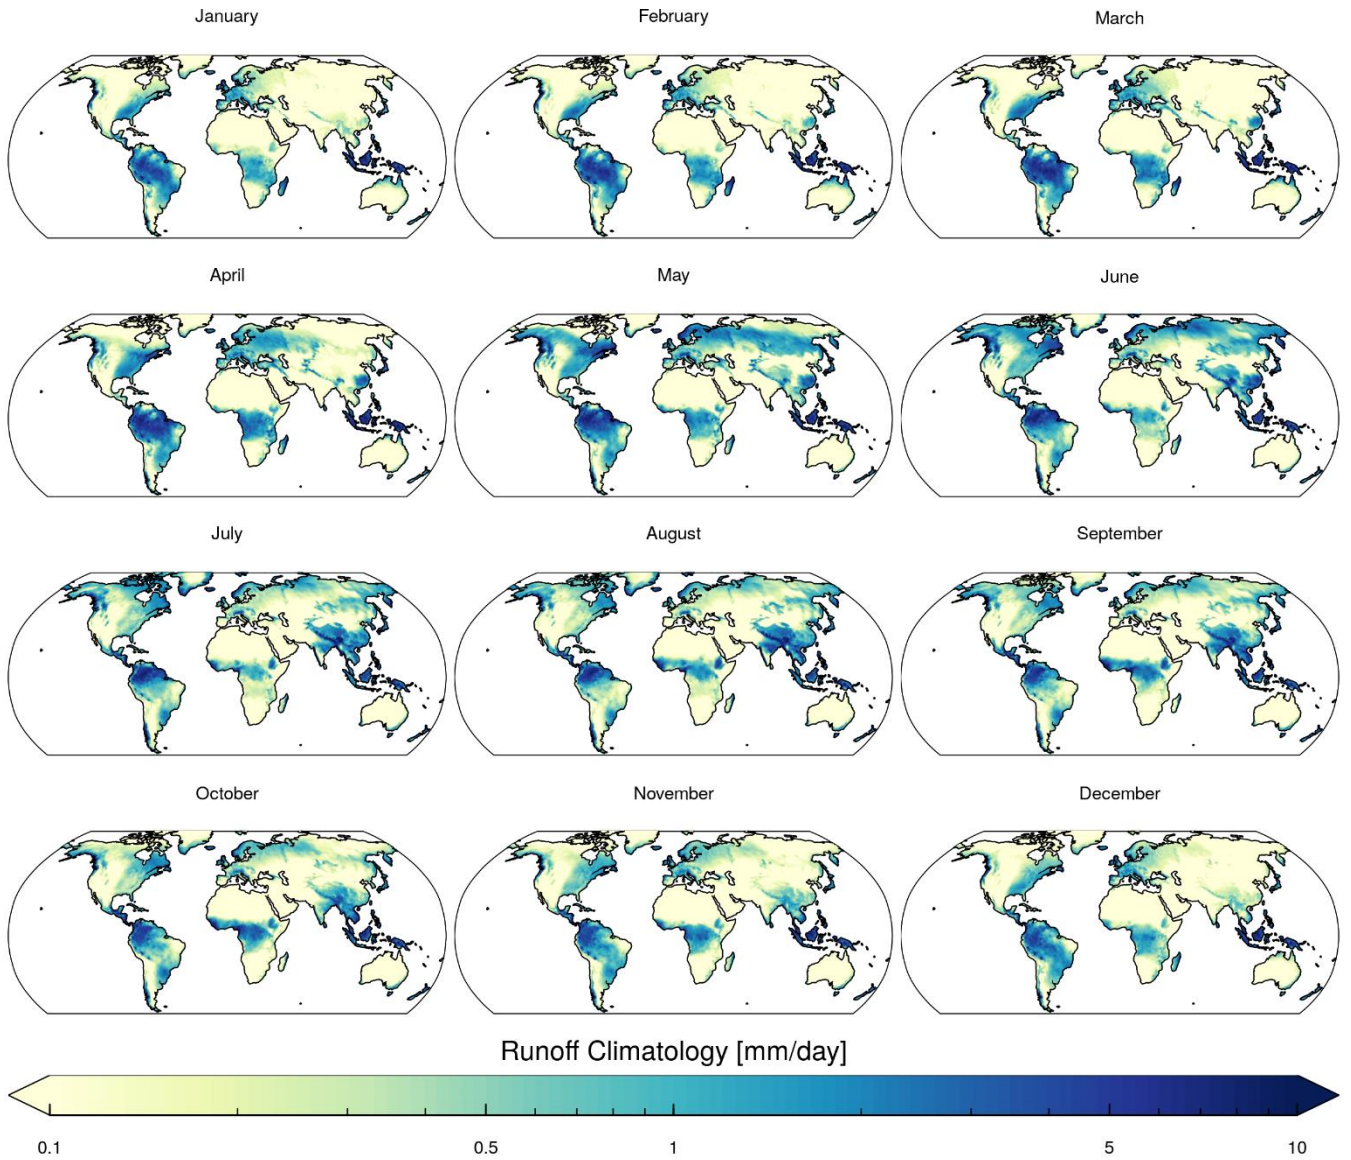

**Supplementary Figure 1:** Runoff monthly climatology for the period 1971-2010.

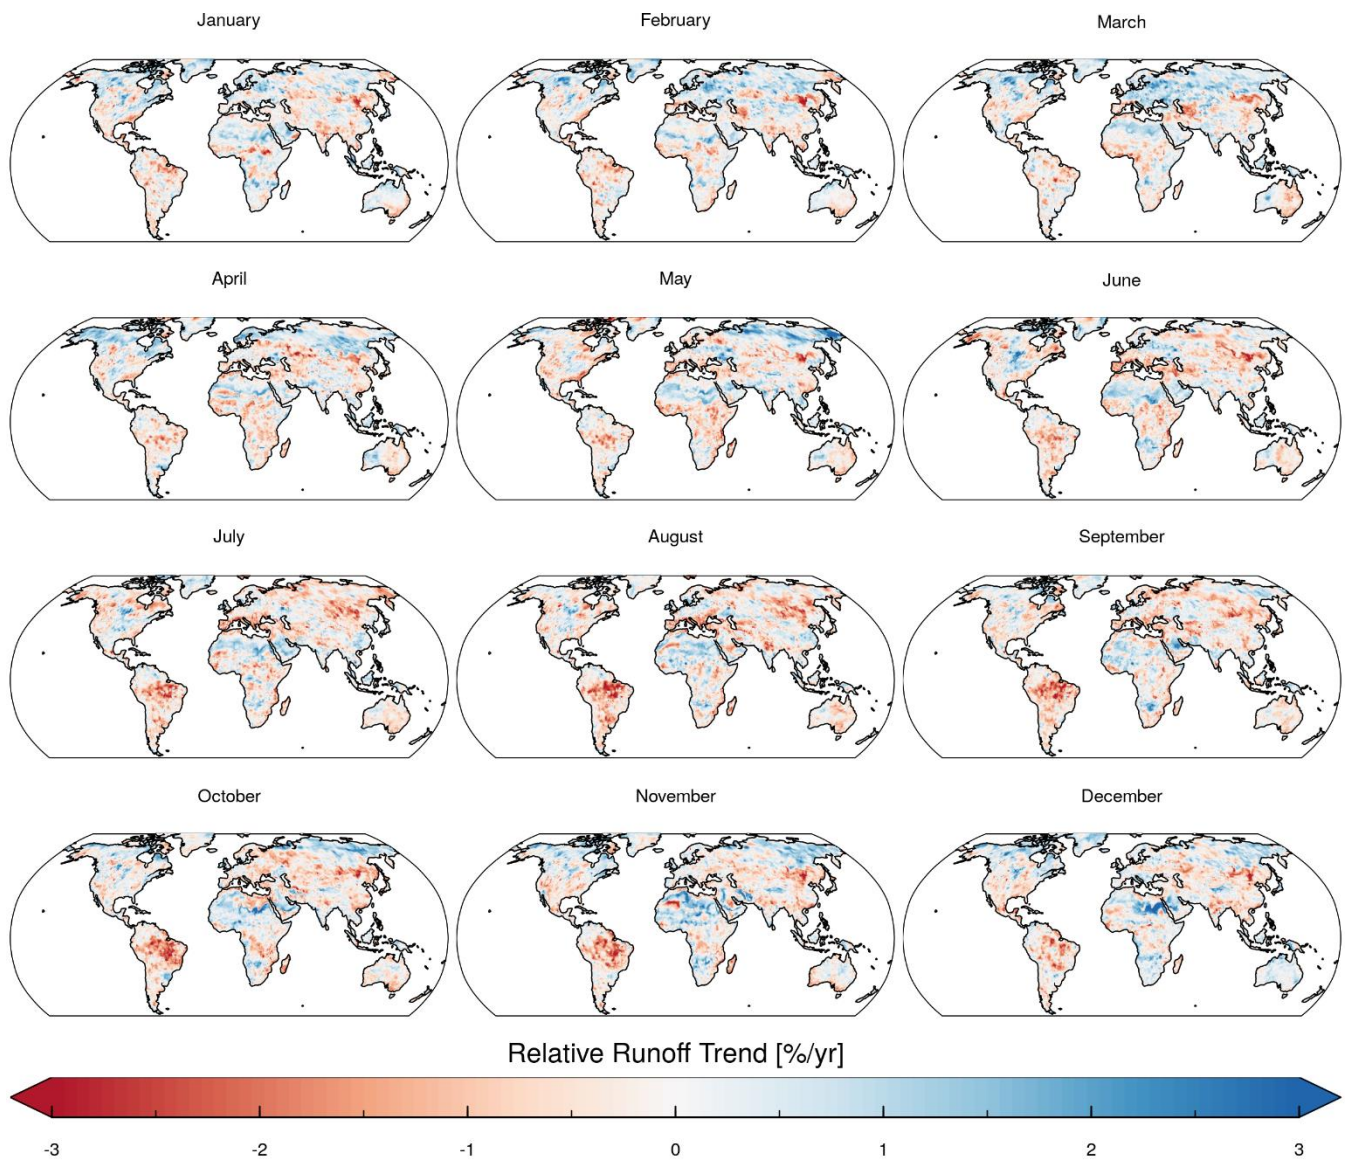

**Supplementary Figure 2:** Runoff monthly trends for the period 1971-2010.

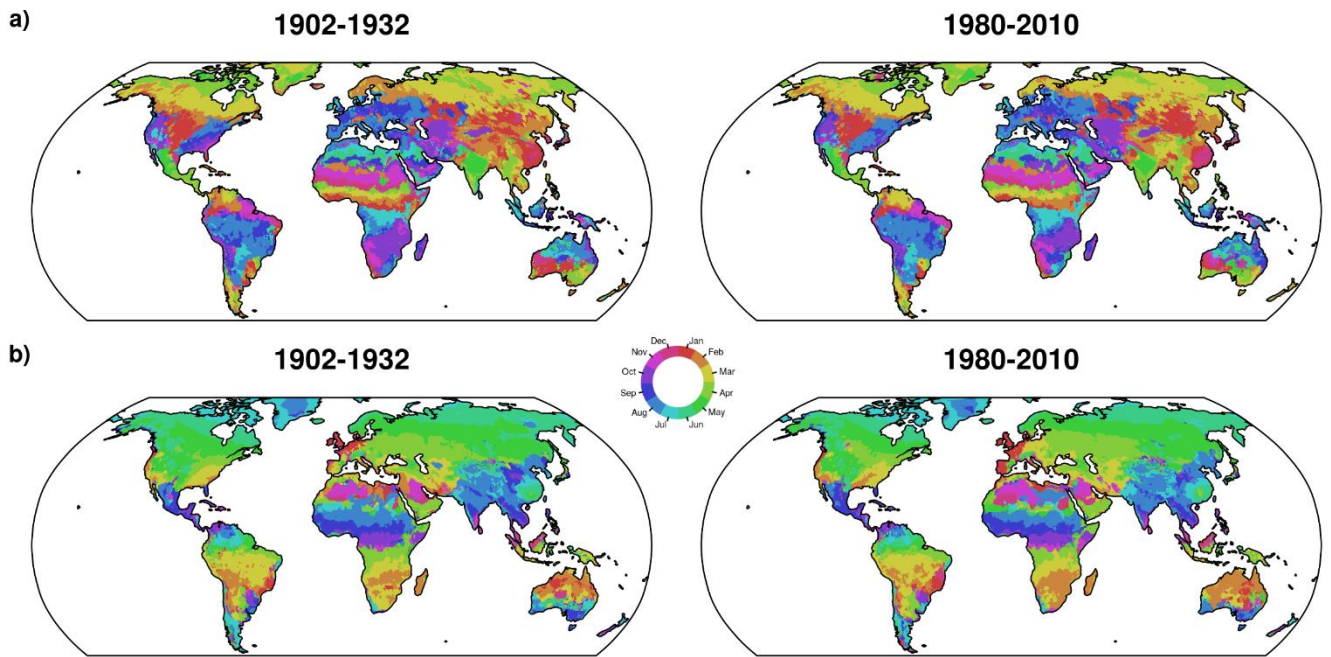

**Supplementary Figure 3:** Changes in runoff timing. a) Minimum runoff b) Maximum runoff.
